# Supplementary material
Source: PubMed Central journal article supplement (PMC1885973)

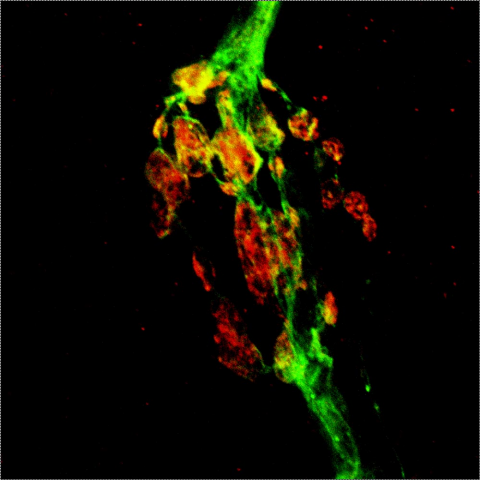

Supplement: NIHMS21591-supplement-01.pdf [file NIHMS21591-supplement-01.pdf]
